# Supplementary figures and images for: Biochemical and Molecular Characterization of Musa sp. Cultured on Temporary Immersion Bioreactor
Source: Preprints.org preprint supplement (doi:10.20944/preprints202301.0117.v1), 2023-01-06

**Supplementary material**


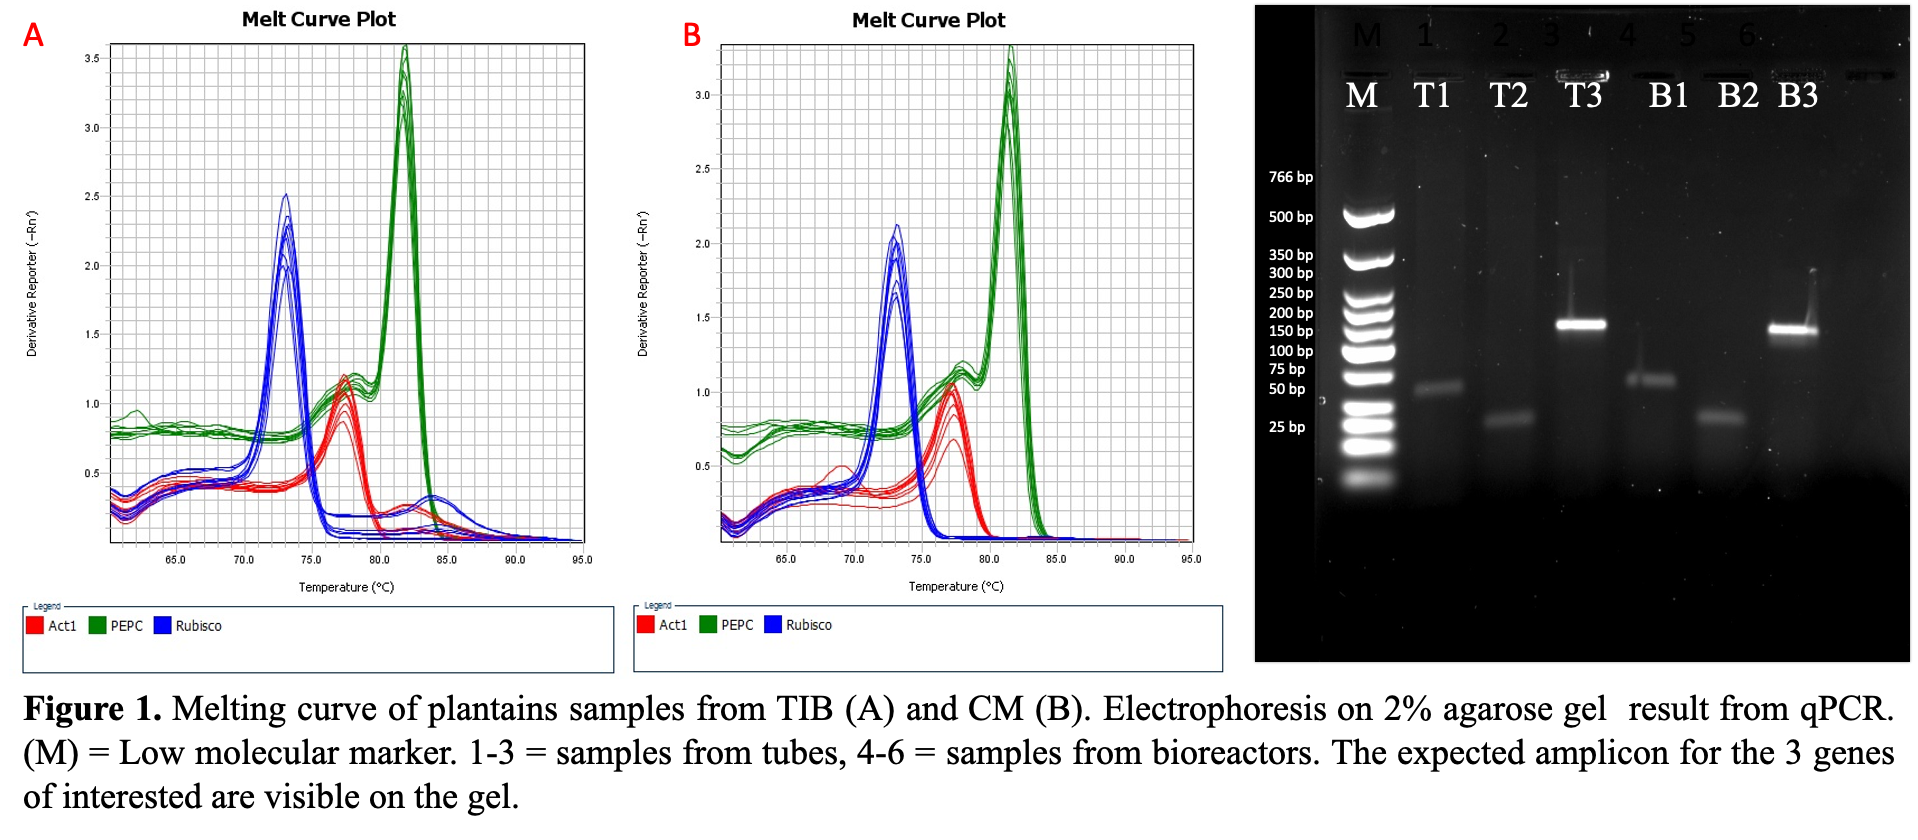


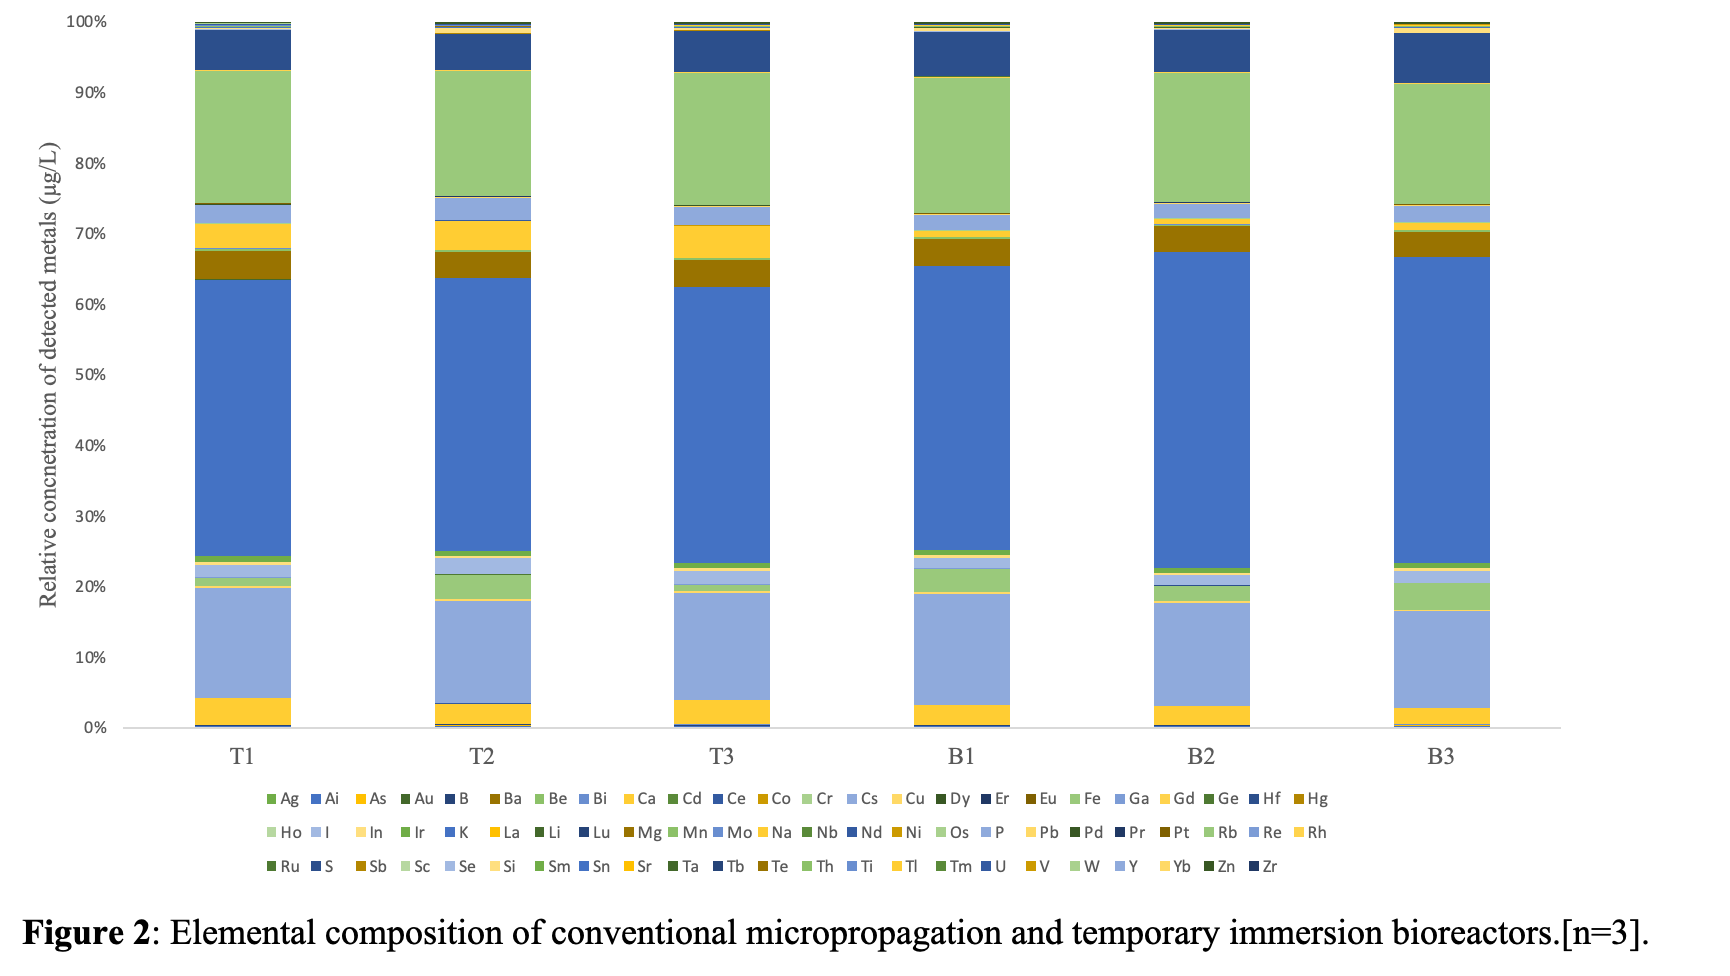


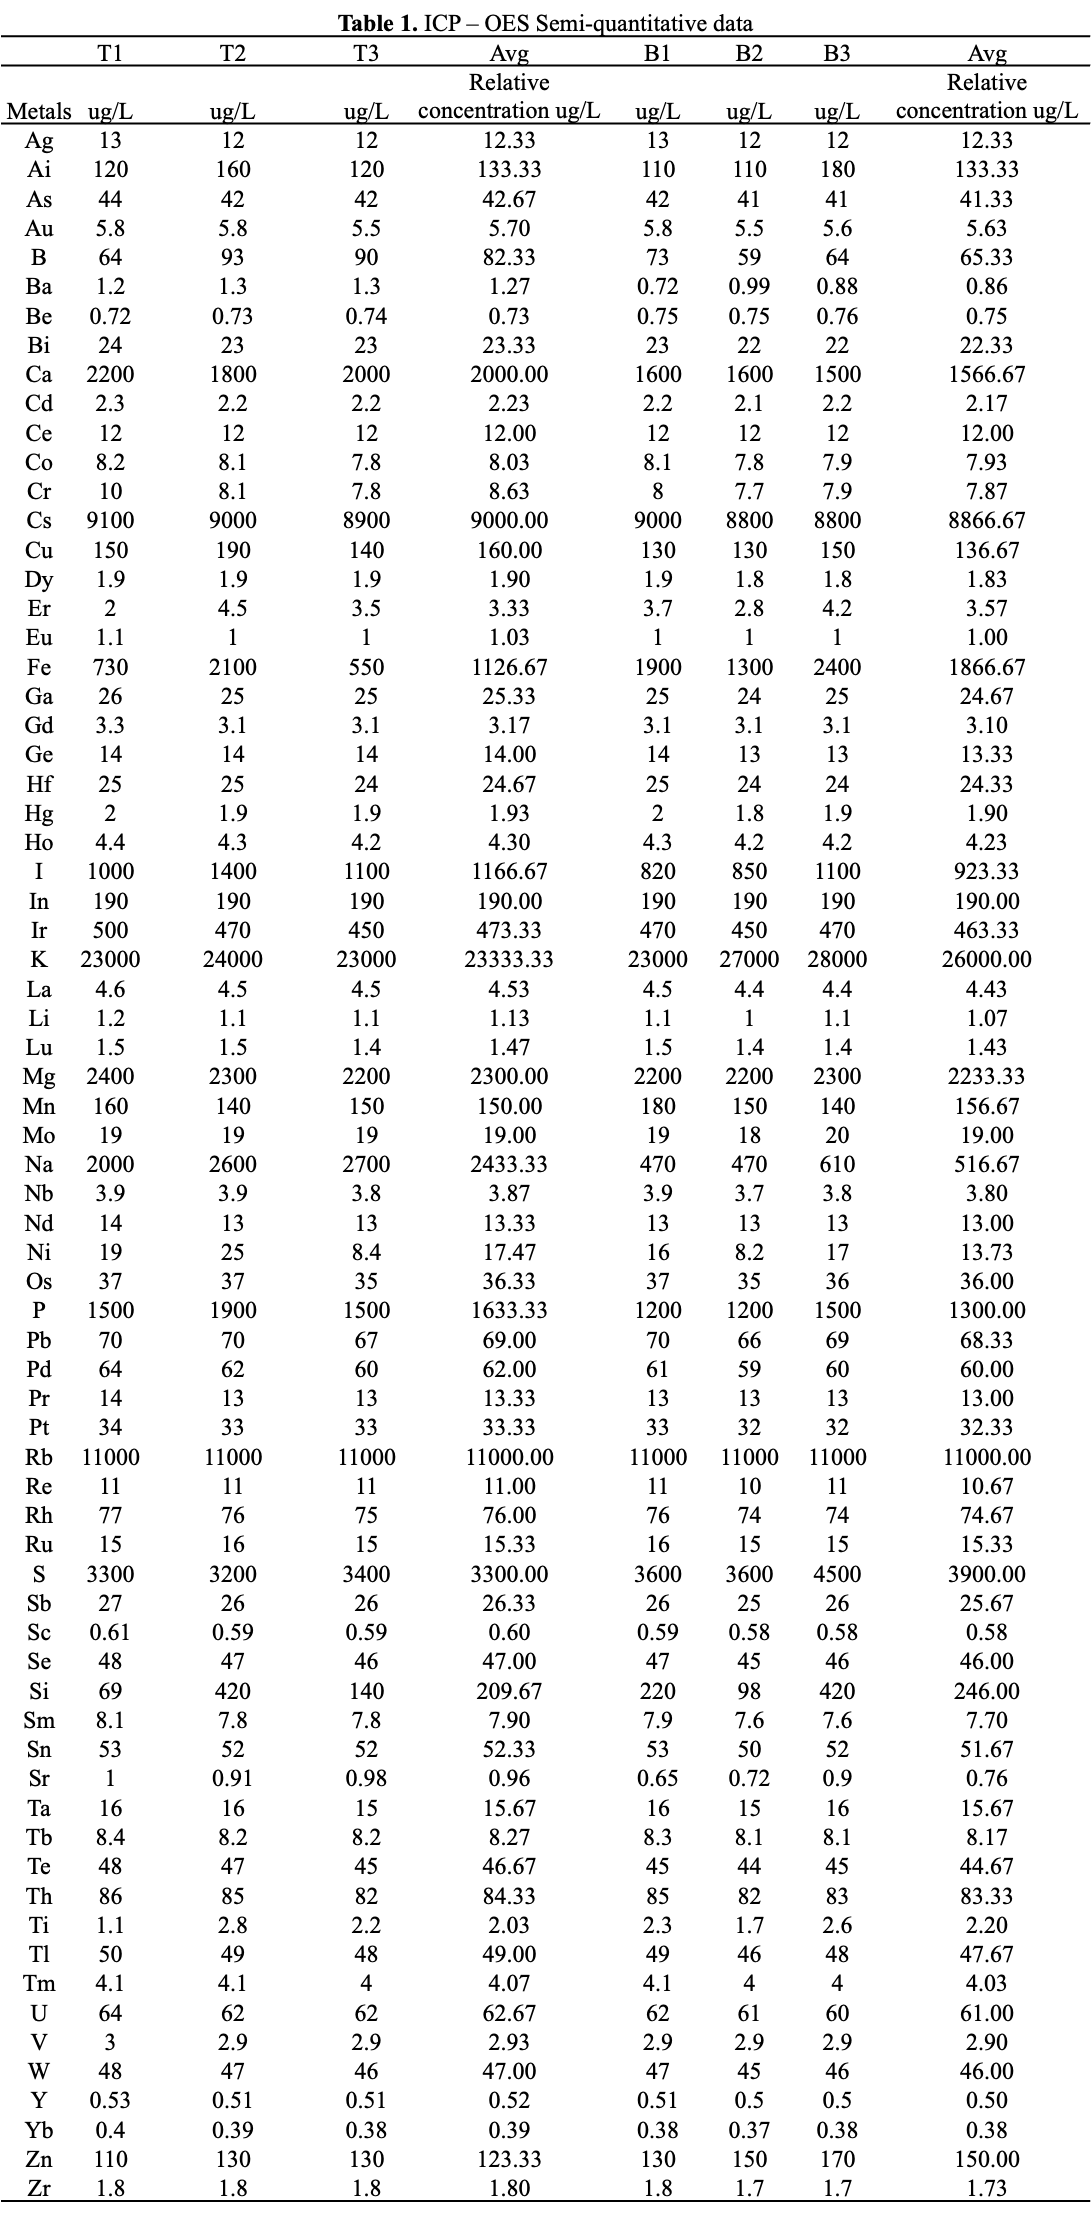

Supplement: Supplementary file 1 [file supplementary]
